# Supplementary material for: An acetoxy functionalized Al(iii) based metal–organic framework showing selective “turn on” detection of perborate in environmental samples
Source: Royal Society of Chemistry journal article supplement (doi:10.1039/d0dt02422h), 2020-01-01
Supplement: d0dt02422h1.pdf [file d0dt02422h1.pdf]

Electronic Supplementary Information (ESI) for Dalton Transactions.

This journal is © The Royal Society of Chemistry 2020

### Supporting Information For

## **Acetoxy functionalized Al(III) based metal-organic framework showing selective “turn on” detection of perborate in environmental samples**

*Soutick Nandi,<sup>a</sup> Helge Reinsch,<sup>b</sup> and Shyam Biswas<sup>a\*</sup>*

*<sup>a</sup> Department of Chemistry, Indian Institute of Technology Guwahati, Guwahati, 781039 Assam, India.*

*<sup>b</sup> Institut für Anorganische Chemie, Christian-Albrechts-Universität, Max-Eyth-Strasse 2, 24118 Kiel, Germany.*

*\* Corresponding author. Tel: 91-3612583309, Fax: 91-3612582349.*

*E-mail address: sbiswas@iitg.ac.in.*

**Materials and Characterization Methods.** The ligand 5-acetoxy isophthalic acid ( $H_2IPA-OCOCH_3$ ) was achieved by following the previously reported procedure, which is followed for the preparation of 2,5-diacetoxy benzene-1,4-dicarboxylic acid ligand (Scheme S1).<sup>1</sup> The  $^1H$  NMR,  $^{13}C$  NMR and mass spectra of this ligand are shown in Figures S1-S3 (Supporting Information). All other required chemicals were purchased from commercial sources and used without purification. Fourier transform infrared (FT-IR) spectra were recorded with a Perkin Elmer Spectrum two FT-IR spectrometer in the range of 440-4000  $cm^{-1}$  with KBr pellet. The below mentioned indications were employed for the characterization of the absorption bands: medium (m), weak (w), broad (br), very strong (vs), strong (s) and shoulder (sh). Ambient temperature X-Ray powder diffraction (XRPD) patterns were collected on a Bruker D2 Phaser X-ray diffractometer (30 kV, 10 mA) using  $Cu-K\alpha$  ( $\lambda = 1.5406 \text{ \AA}$ ) radiation. FE-SEM images were captured with a Zeiss (Zemini) scanning electron microscope. Thermogravimetric analyses (TGA) were collected under air atmosphere at a heating rate of 10  $^{\circ}C \text{ min}^{-1}$  in a temperature region of 25-800  $^{\circ}C$  by employing a Netzsch STA-409CD thermal analyzer. Fluorescence emission behavior was recorded by a HORIBA JOBIN YVON Fluoromax-4 spectrofluorometer. The excitation wavelength ( $\lambda_{ex}$ ) was 365 nm for all the fluorescence experiments. The nitrogen sorption isotherms were performed employing a Quantachrome Autosorb iQ-MP gas sorption analyzer at -196  $^{\circ}C$ . Prior to the sorption measurement, degassing of the material was performed at 90  $^{\circ}C$  for 12 h under dynamic vacuum. A Bruker Avance III 600 spectrometer was utilized for recording  $^1H$  NMR spectra at 400 MHz. The mass spectrum (in ESI mode) was measured with an Agilent 6520 Q-TOF high-resolution mass spectrometer.

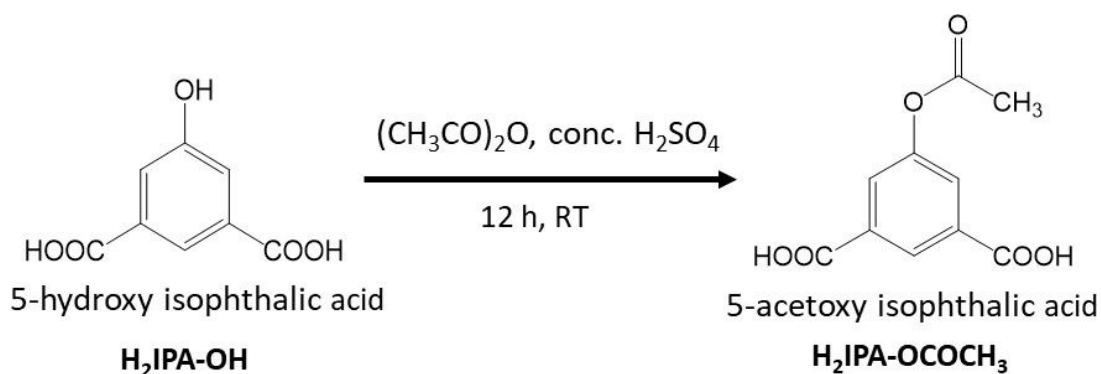

**Scheme S1.** Scheme for the preparation of 5-acetoxy isophthalic acid ( $H_2IPA-OCOCH_3$ ) ligand.

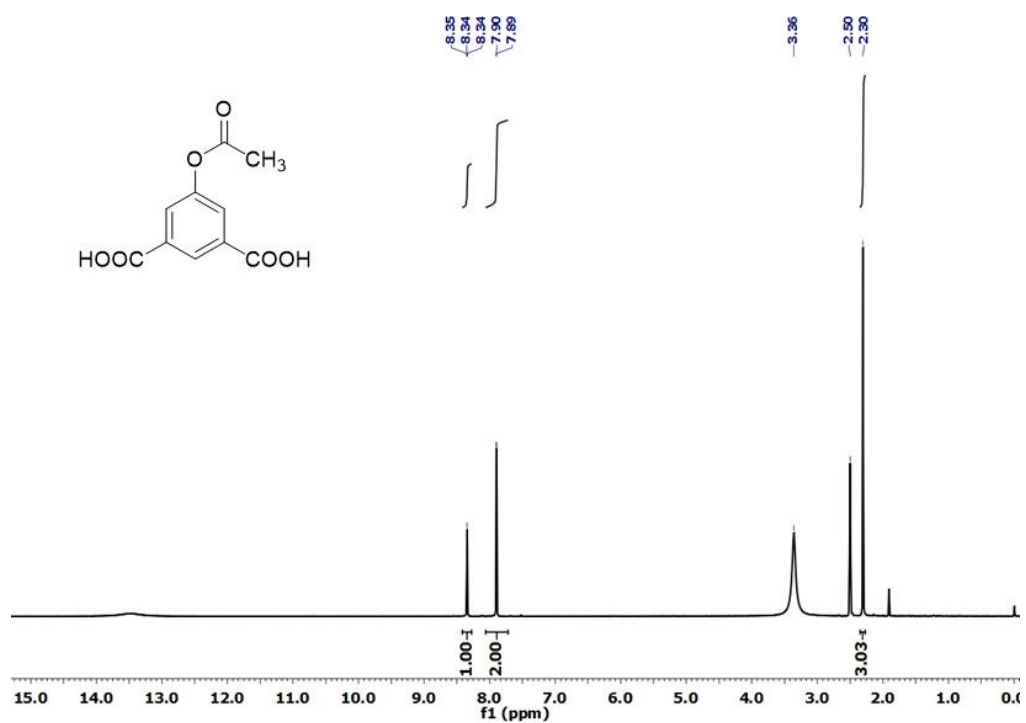

**Figure S1.** <sup>1</sup>H NMR spectrum of H<sub>2</sub>IPA-OCOCH<sub>3</sub> ligand.

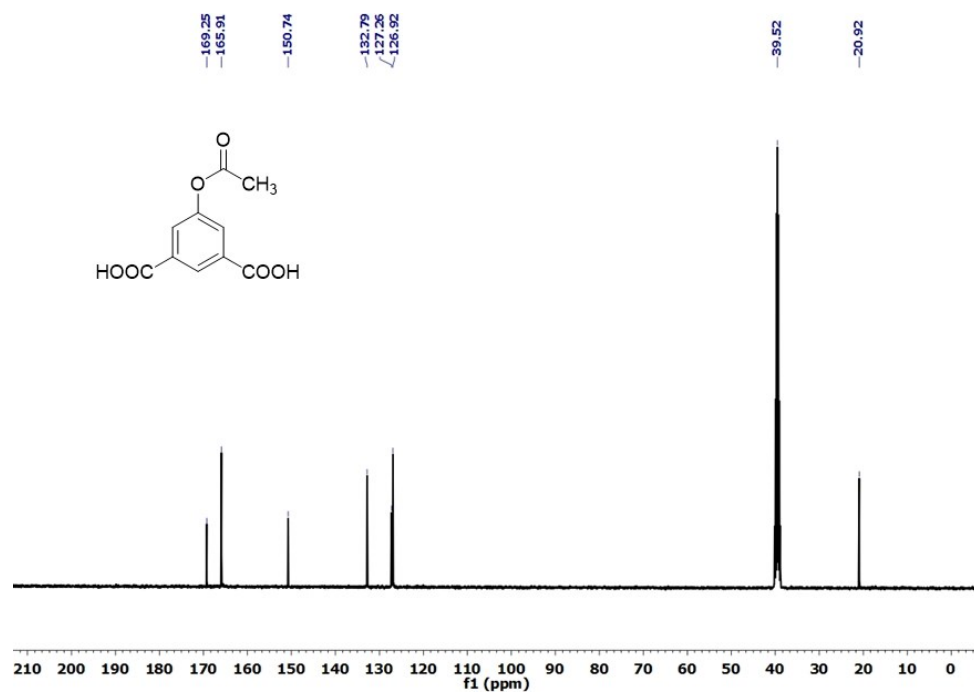

**Figure S2.** <sup>13</sup>C NMR spectrum of H<sub>2</sub>IPA-OCOCH<sub>3</sub> ligand.

|               |            |             |                      |                 |              |                        |                       |
|---------------|------------|-------------|----------------------|-----------------|--------------|------------------------|-----------------------|
| Sample Name   | SN-35-B1   | Position    | P2-B8                | Instrument Name | Instrument 1 | User Name              |                       |
| Inj Vol       | 20         | InjPosition |                      | SampleType      | Sample       | IRM Calibration Status | Success               |
| Data Filename | SN-35-B1.d | ACQ Method  | ESI ALS 100-1000-NEG | Comment         |              | Acquired Time          | 8/16/2019 11:44:02 AM |

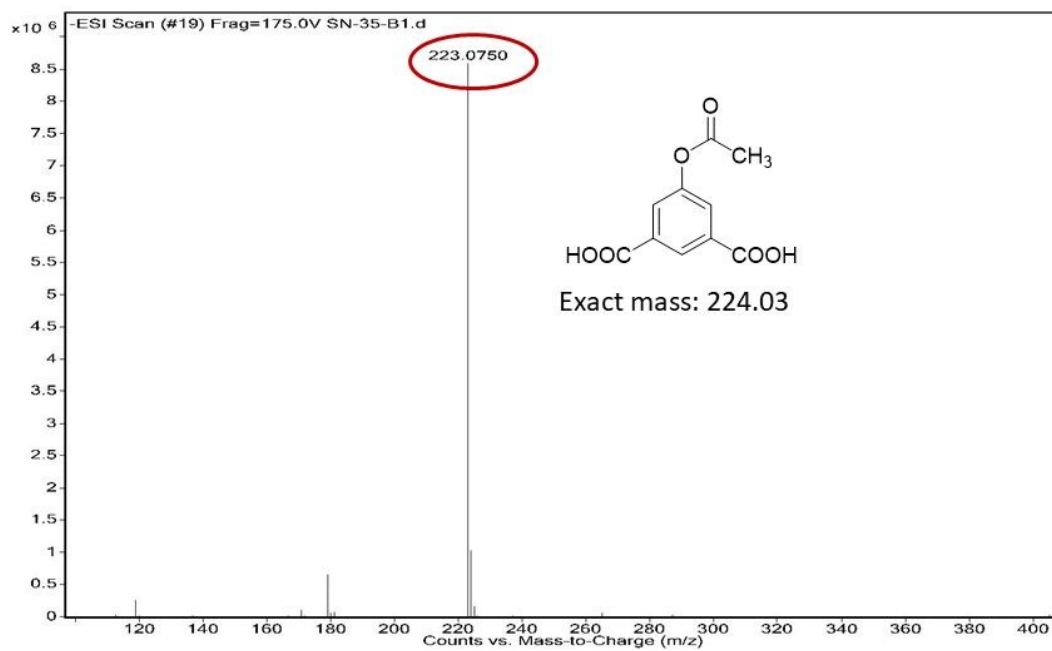

**Figure S3.** ESI-MS spectrum of H<sub>2</sub>IPA-OCOCH<sub>3</sub> ligand.

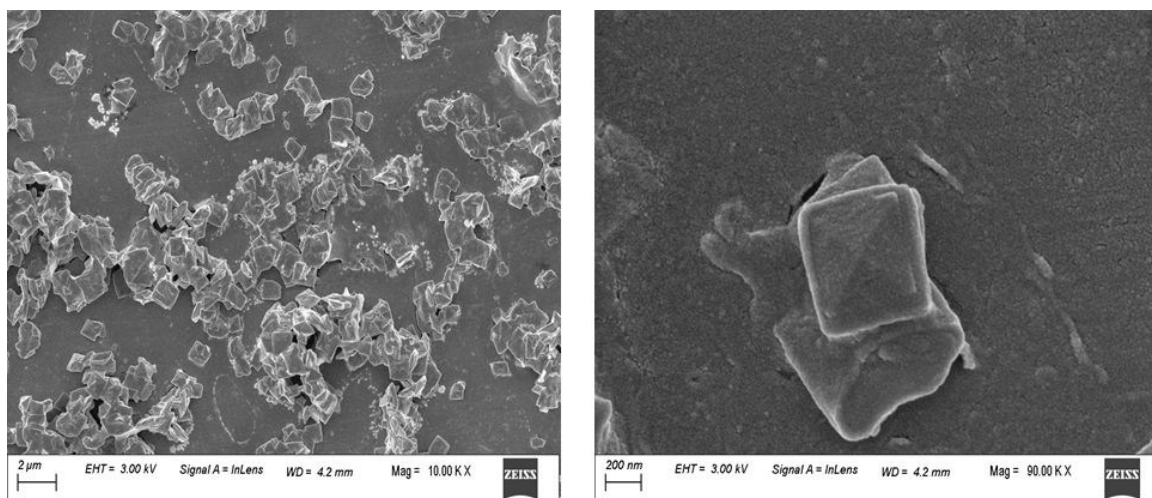

**Figure S4.** FE-SEM images of **1'** under different magnifications.

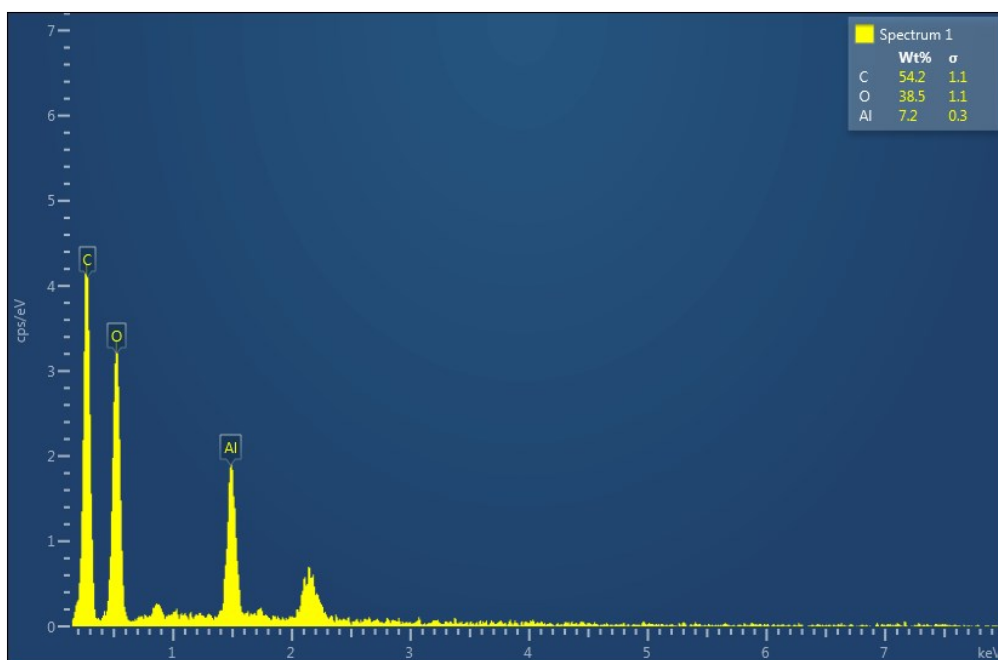

**Figure S5.** EDX spectrum of 1'.

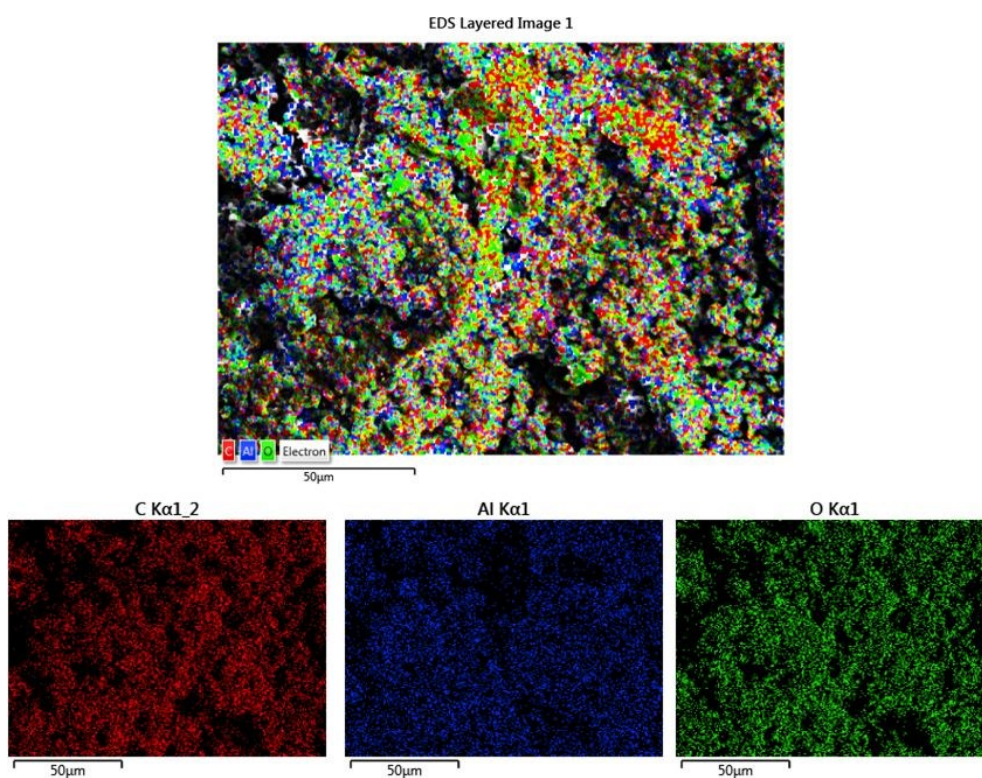

**Figure S6.** EDX elemental mapping of 1'.

**Table S1.** Structural refinement parameters for **1**.

| MOF                           | CAU-10-OCOCH <sub>3</sub> |
|-------------------------------|---------------------------|
| Crystal system                | tetragonal                |
| Space group                   | <i>I4<sub>1</sub>md</i>   |
| $a = b$ [Å]                   | 21.3489(5)                |
| $c$ [Å]                       | 10.9008(3)                |
| $\alpha = \beta = \gamma$ [°] | 90                        |
| R <sub>wp</sub> [%]           | 3.8                       |
| GoF                           | 1.9                       |

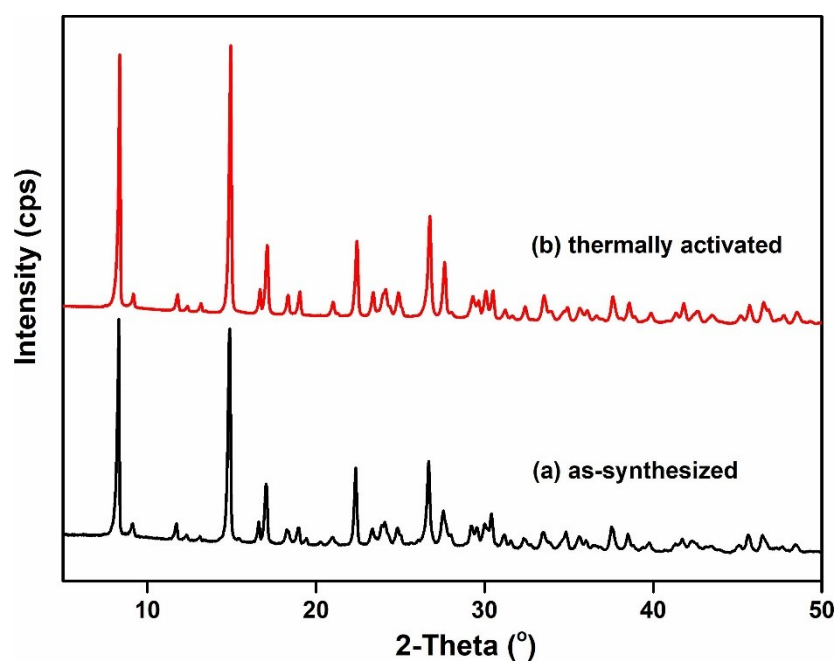

**Figure S7.** XRPD patterns of the as-synthesized (black) and activated (red) CAU-10-OCOCH<sub>3</sub> compound.

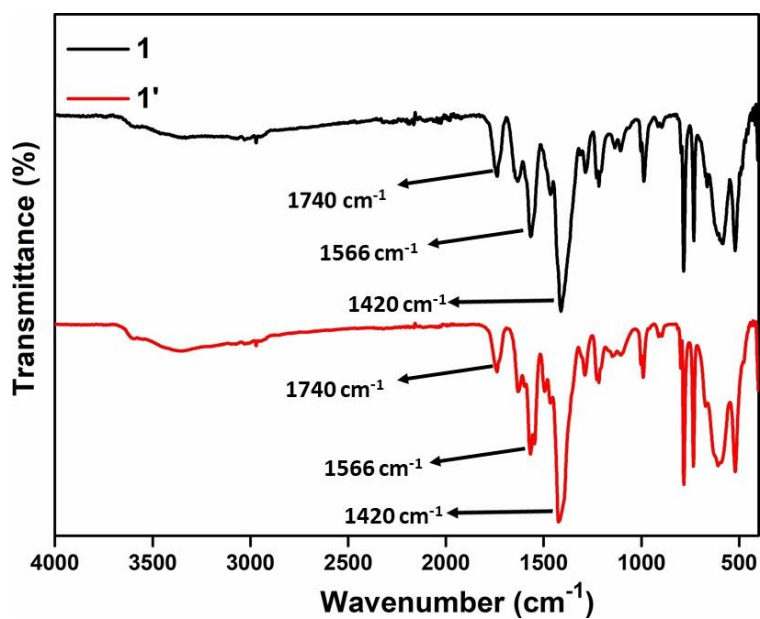

**Figure S8.** FT-IR spectra of as-synthesized **1** and thermally activated **1'**.

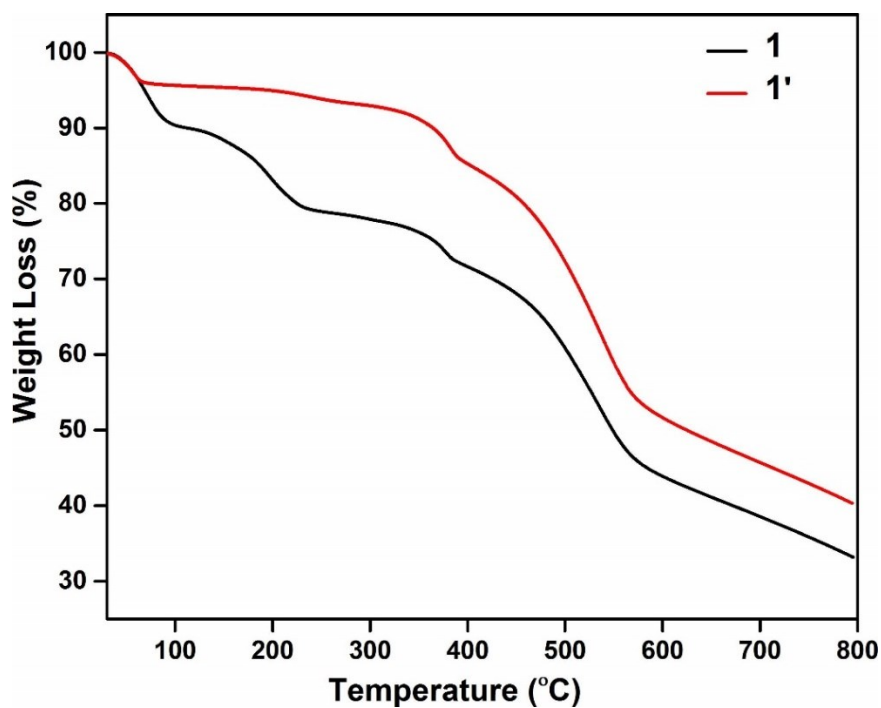

**Figure S9.** TG curves of as-synthesized and activated material measured in the temperature range of 25-800  $^{\circ}\text{C}$  at a heating rate of 10  $^{\circ}\text{C min}^{-1}$ .

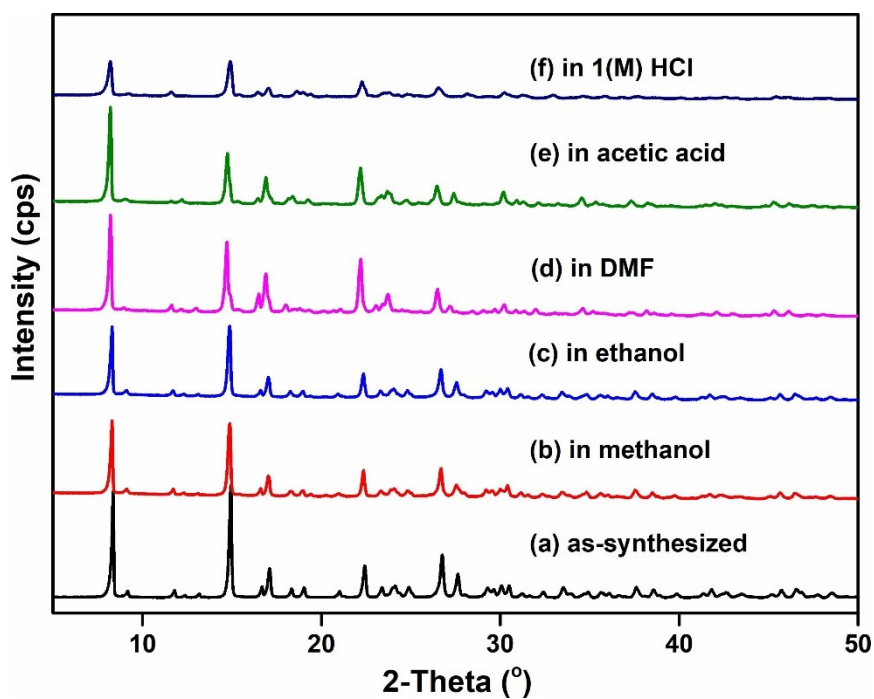

**Figure S10.** XRPD patterns of as-synthesized **1** (a), in methanol (b), in ethanol (c), in DMF (d), in acetic acid (e) and in 1 (M) HCl (i).

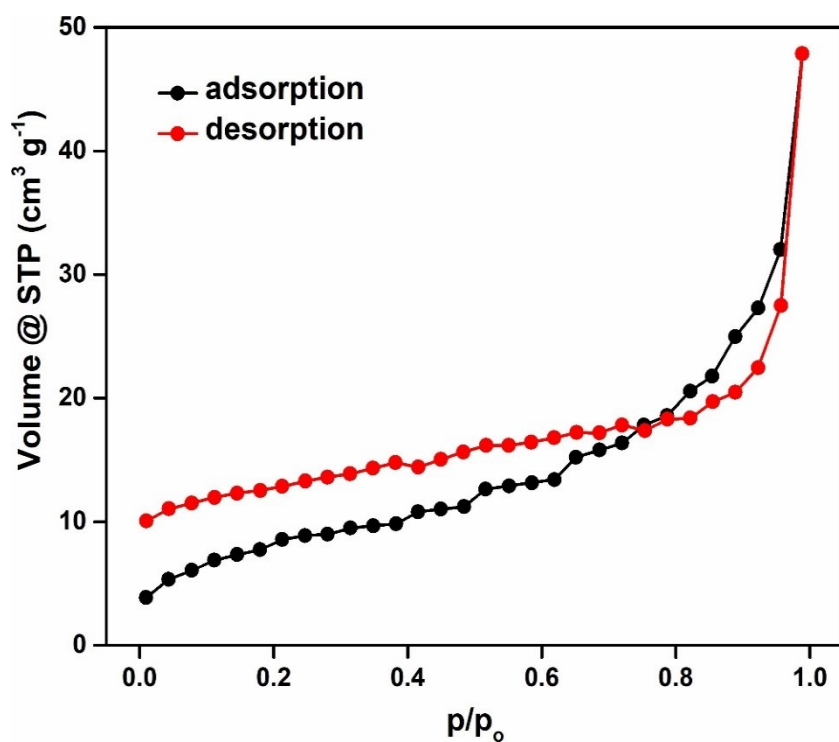

**Figure S11.** N<sub>2</sub> adsorption (solid black circles) and desorption (solid red circles) isotherms of activated compound measured at -196 °C.



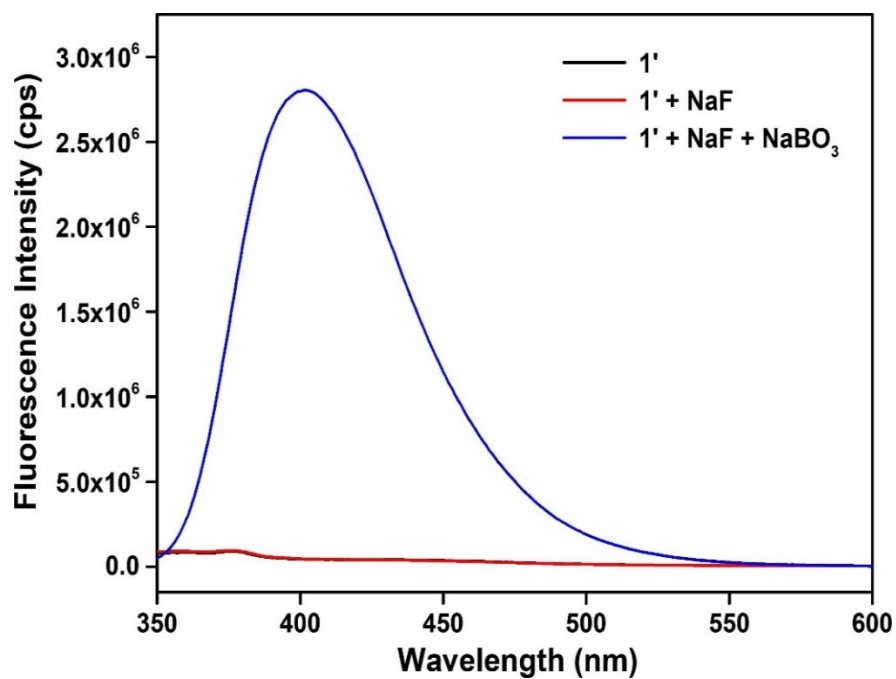

**Figure S12.** Change in the fluorescence emission intensity of **1'** upon addition of 10 mM NaBO<sub>3</sub> solution (500  $\mu$ L) in presence of 10 mM NaF solution (500  $\mu$ L).

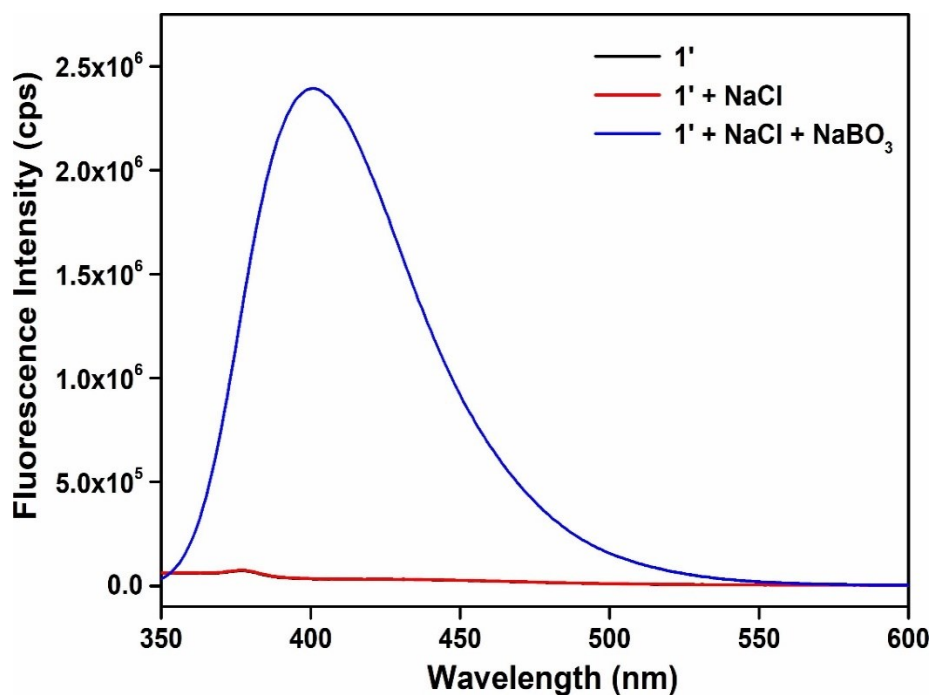

**Figure S13.** Change in the fluorescence emission intensity of **1'** upon addition of 10 mM NaBO<sub>3</sub> solution (500  $\mu$ L) in presence of 10 mM NaCl solution (500  $\mu$ L).

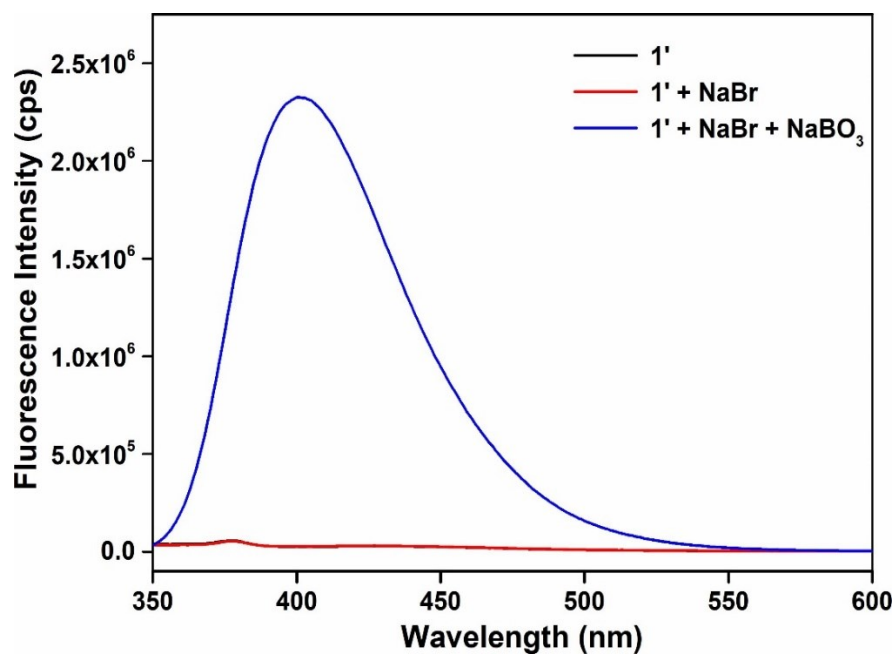

**Figure S14.** Change in the fluorescence emission intensity of **1'** upon addition of 10 mM NaBO<sub>3</sub> solution (500 μL) in presence of 10 mM NaBr solution (500 μL).

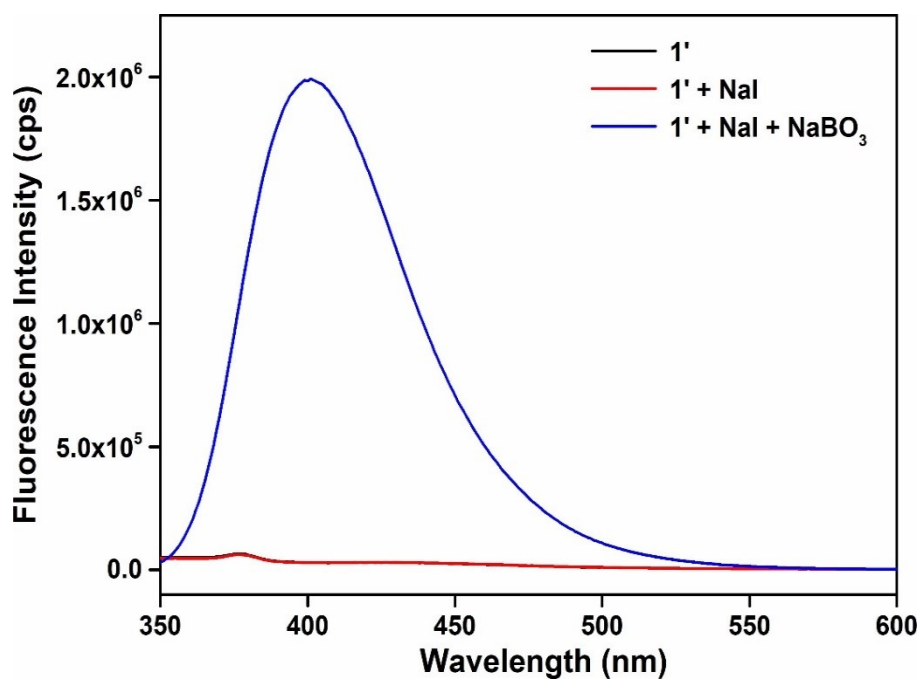

**Figure S15.** Change in the fluorescence emission intensity of **1'** upon addition of 10 mM NaBO<sub>3</sub> solution (500 μL) in presence of 10 mM NaI solution (500 μL).

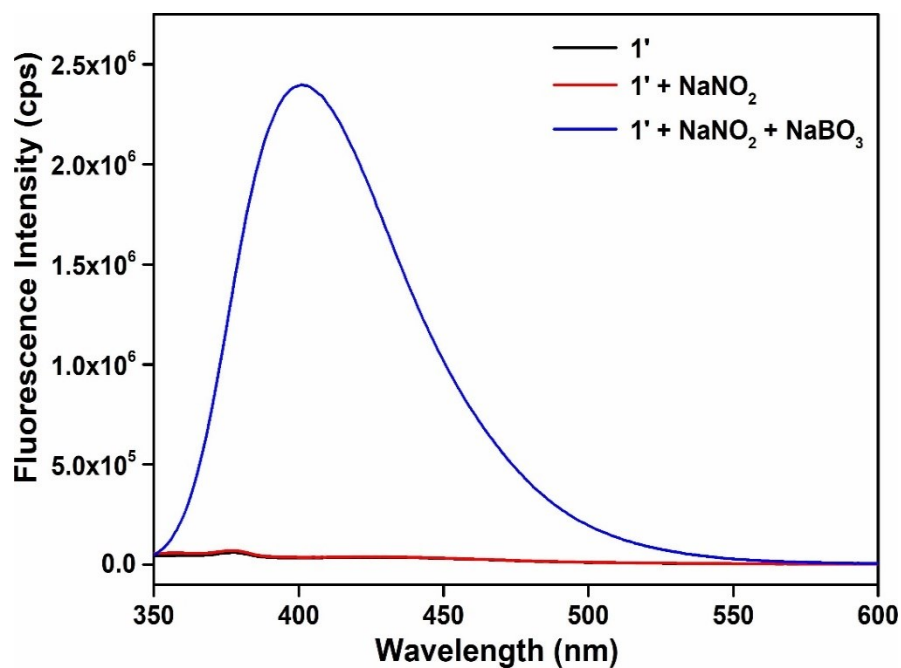

**Figure S16.** Change in the fluorescence emission intensity of **1'** upon addition of 10 mM NaBO<sub>3</sub> solution (500 μL) in presence of 10 mM NaNO<sub>2</sub> solution (500 μL).

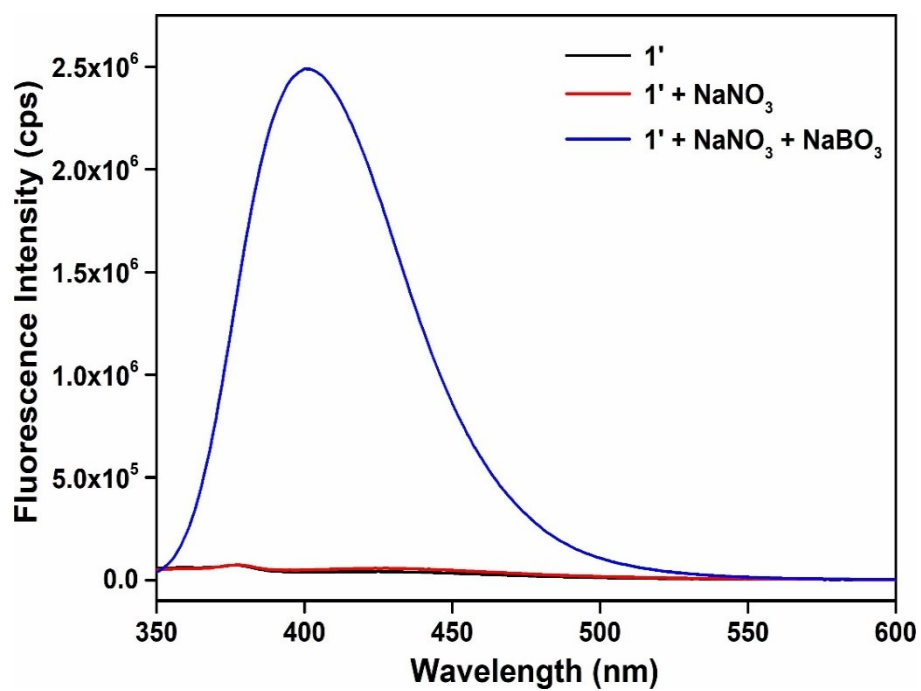

**Figure S17.** Change in the fluorescence emission intensity of **1'** upon addition of 10 mM NaBO<sub>3</sub> solution (500 μL) in presence of 10 mM NaNO<sub>3</sub> solution (500 μL).

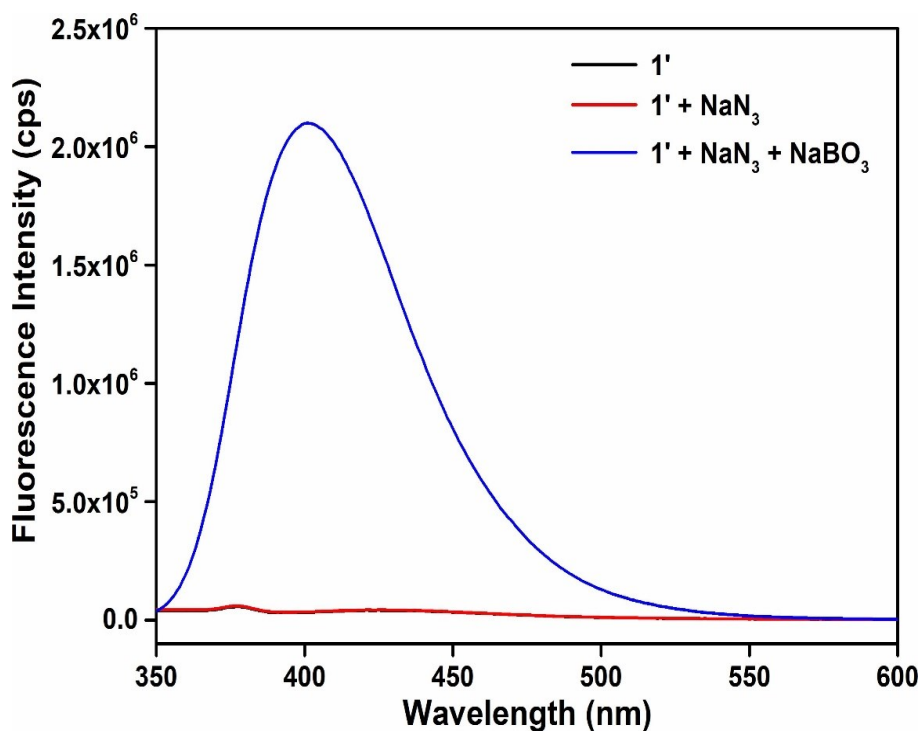

**Figure S18.** Change in the fluorescence emission intensity of **1'** upon addition of 10 mM NaBO<sub>3</sub> solution (500 μL) in presence of 10 mM NaN<sub>3</sub> solution (500 μL).

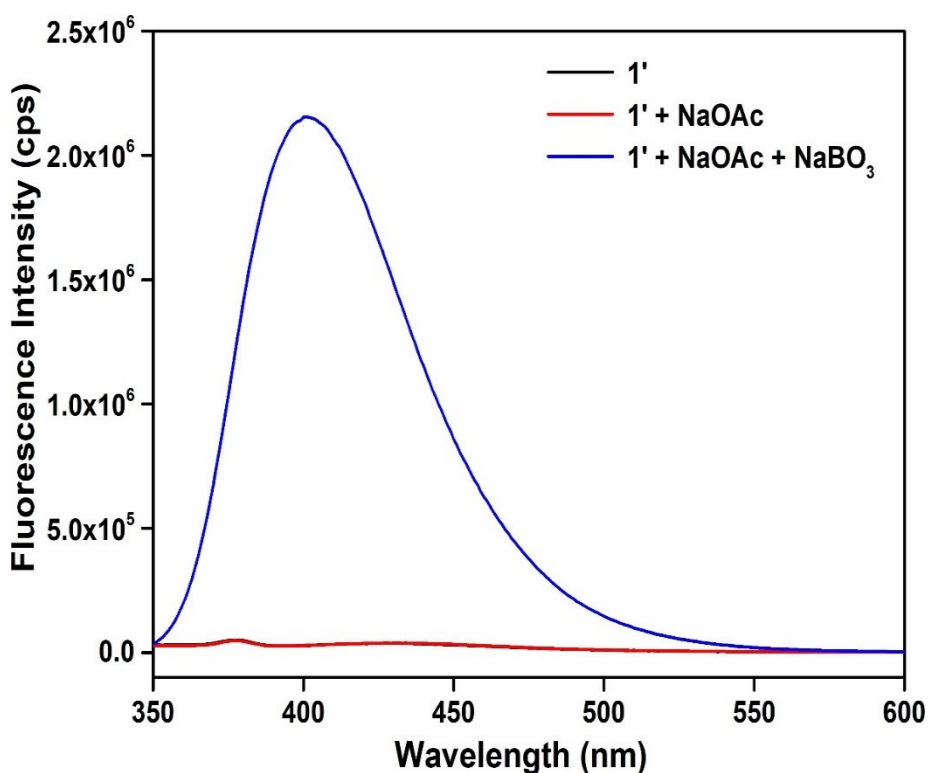

**Figure S19.** Change in the fluorescence emission intensity of **1'** upon addition of 10 mM NaBO<sub>3</sub> solution (500 μL) in presence of 10 mM NaOAc solution (500 μL).

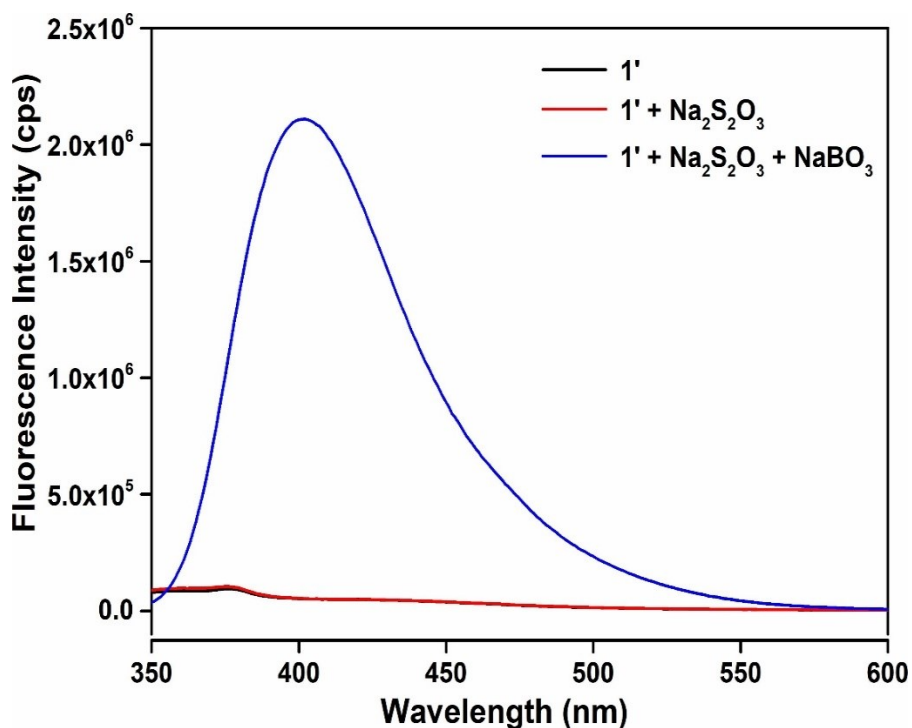

**Figure S20.** Change in the fluorescence emission intensity of **1'** upon addition of 10 mM NaBO<sub>3</sub> solution (500 μL) in presence of 10 mM Na<sub>2</sub>S<sub>2</sub>O<sub>3</sub> solution (500 μL).

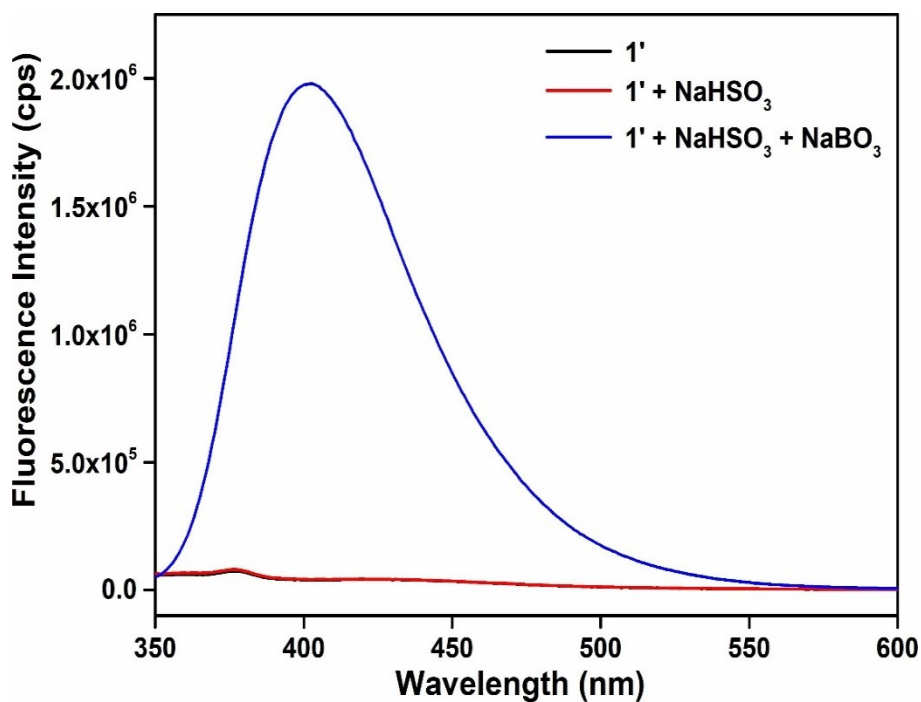

**Figure S21.** Change in the fluorescence emission intensity of **1'** upon addition of 10 mM NaBO<sub>3</sub> solution (500 μL) in presence of 10 mM NaHSO<sub>3</sub> solution (500 μL).

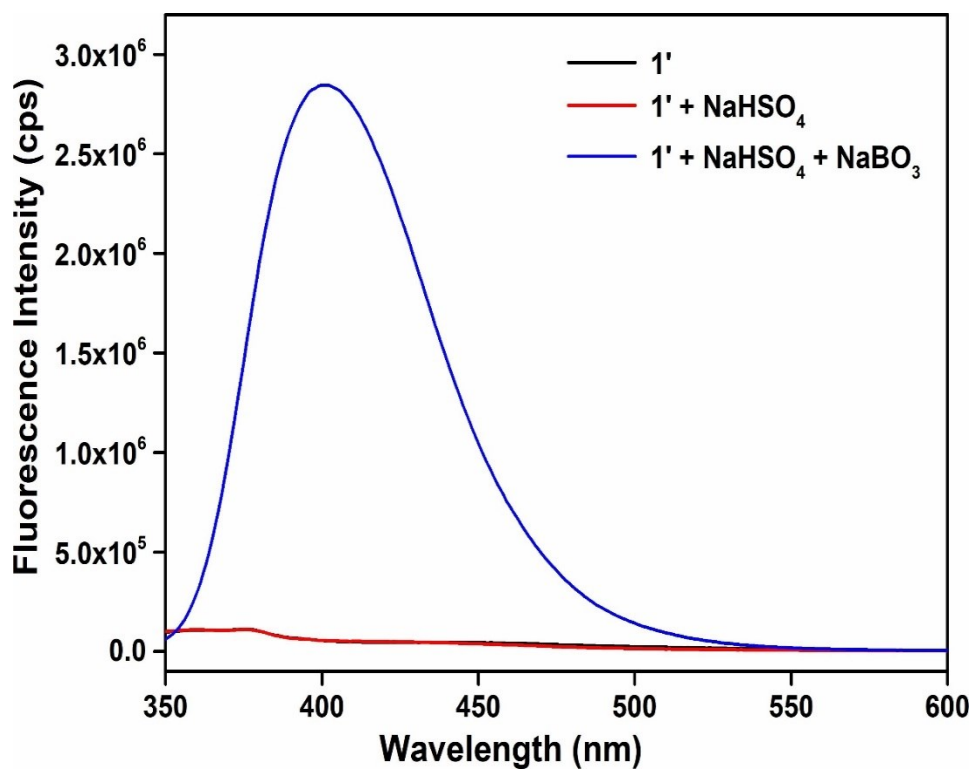

**Figure S22.** Change in the fluorescence emission intensity of **1'** upon addition of 10 mM NaBO<sub>3</sub> solution (500  $\mu$ L) in presence of 10 mM NaHSO<sub>4</sub> solution (500  $\mu$ L).

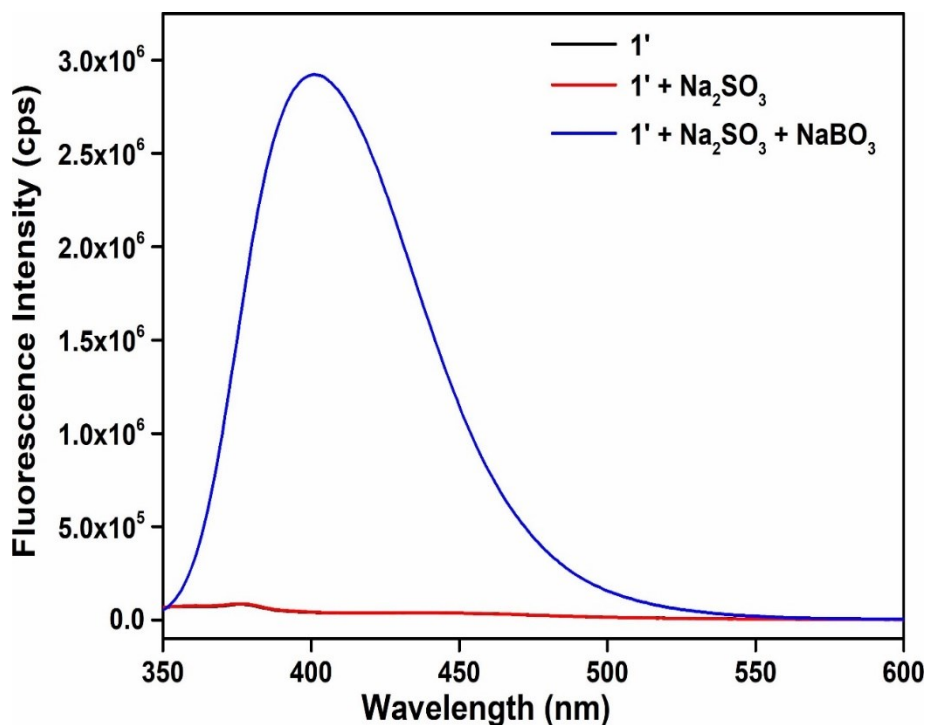

**Figure S23.** Change in the fluorescence emission intensity of **1'** upon addition of 10 mM NaBO<sub>3</sub> solution (500  $\mu$ L) in presence of 10 mM Na<sub>2</sub>SO<sub>3</sub> solution (500  $\mu$ L).

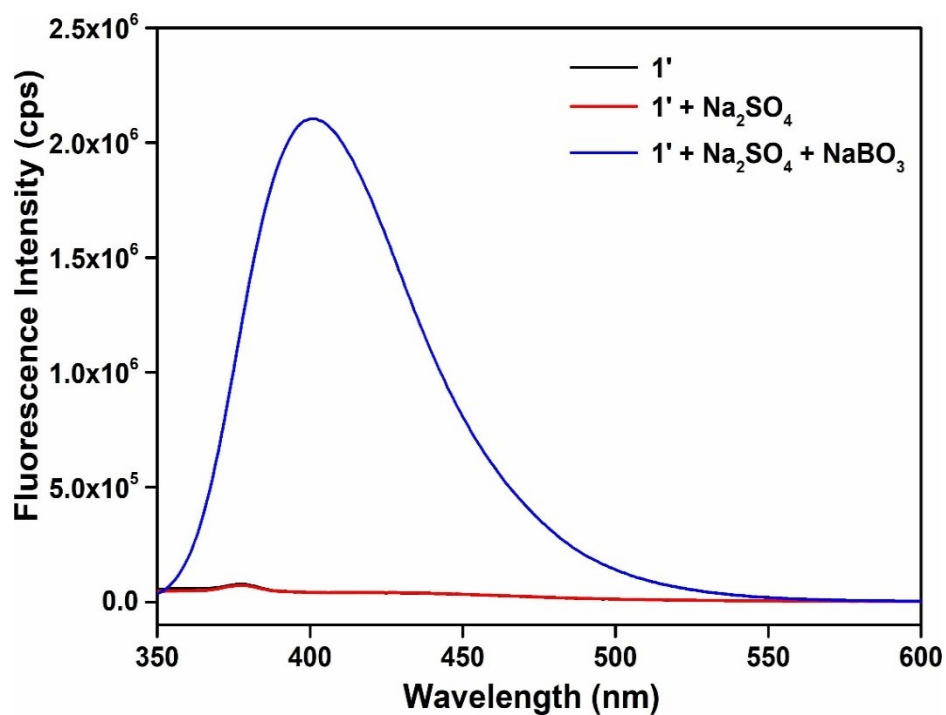

**Figure S24.** Change in the fluorescence emission intensity of **1'** upon addition of 10 mM NaBO<sub>3</sub> solution (500 μL) in presence of 10 mM Na<sub>2</sub>SO<sub>4</sub> solution (500 μL).

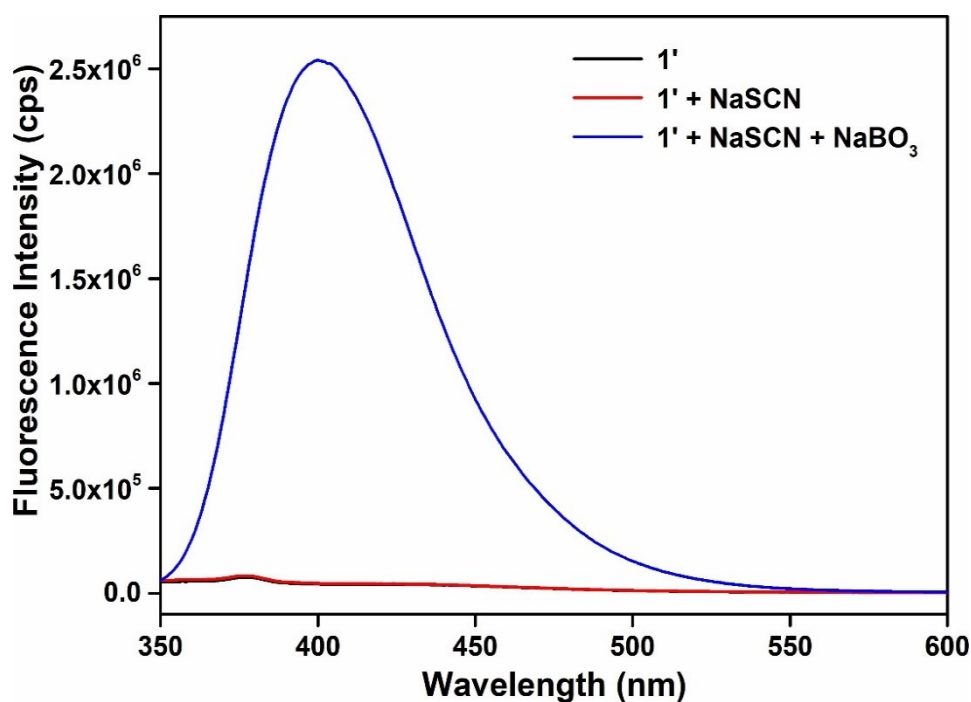

**Figure S25.** Change in the fluorescence emission intensity of **1'** upon addition of 10 mM NaBO<sub>3</sub> solution (500 μL) in presence of 10 mM NaSCN solution (500 μL).

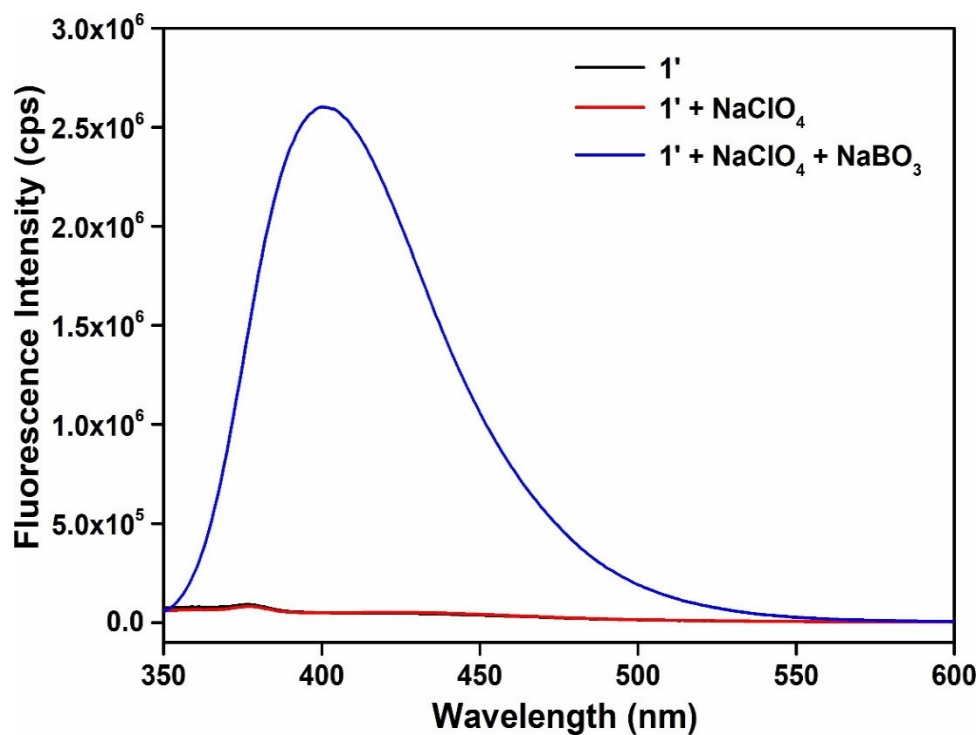

**Figure S26.** Change in the fluorescence emission intensity of **1'** upon addition of 10 mM NaBO<sub>3</sub> solution (500 μL) in presence of 10 mM NaClO<sub>4</sub> solution (500 μL).

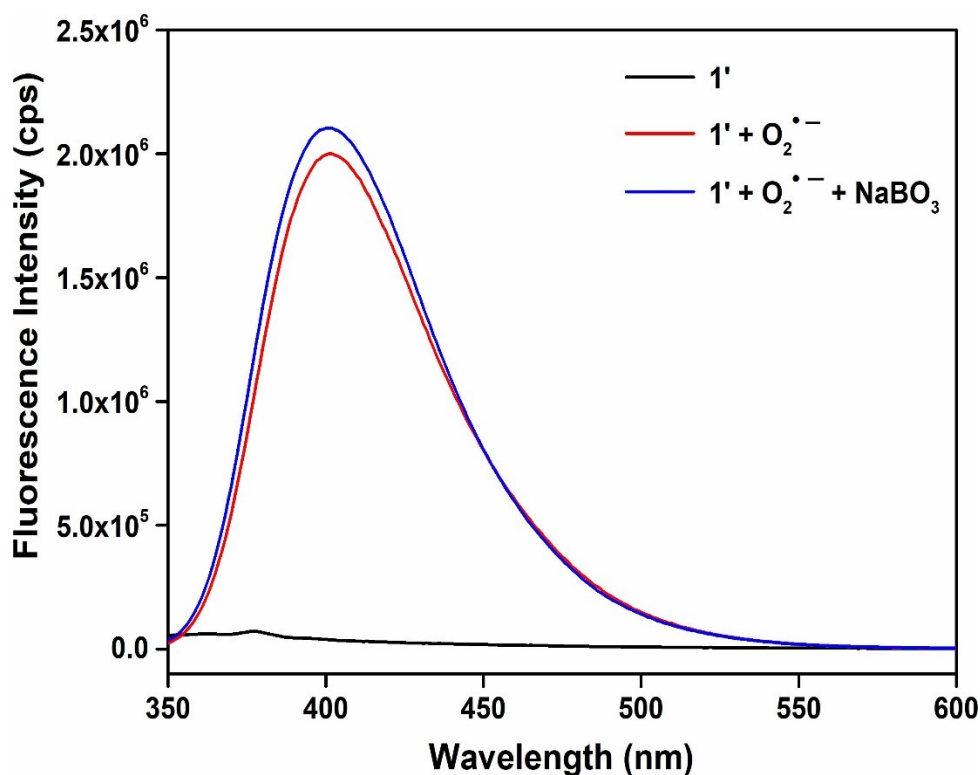

**Figure S27.** Change in the fluorescence emission intensity of **1'** upon addition of 10 mM NaBO<sub>3</sub> solution (500 μL) in presence of 10 mM O<sub>2</sub><sup>•-</sup> solution (500 μL).



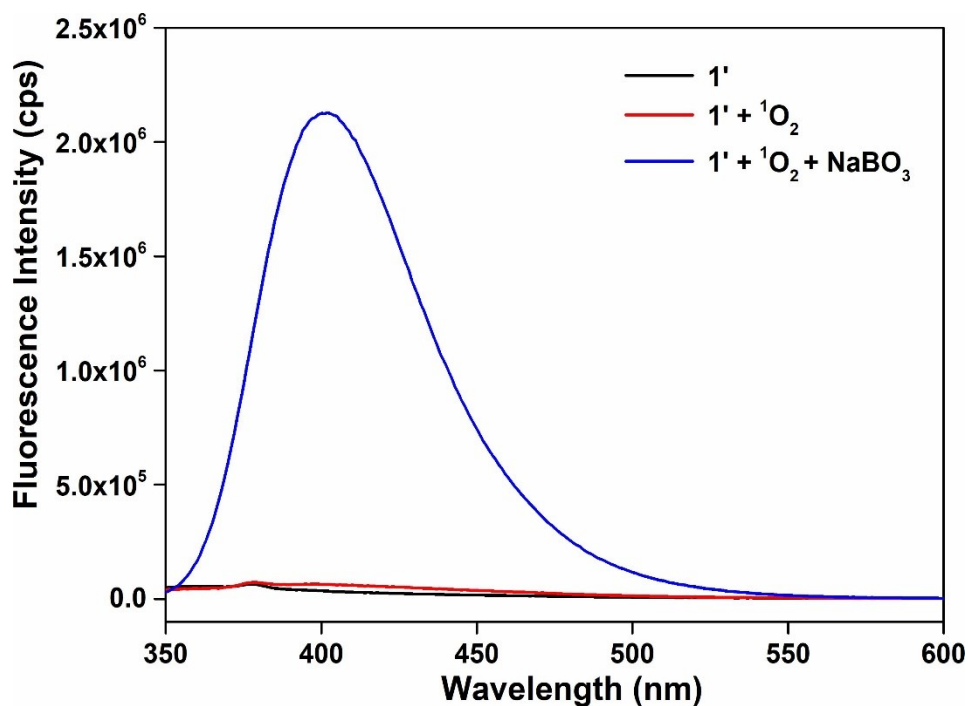

**Figure S28.** Change in the fluorescence emission intensity of 1' upon addition of 10 mM  $\text{NaBO}_3$  solution (500  $\mu\text{L}$ ) in presence of 10 mM  $^1\text{O}_2$  solution (500  $\mu\text{L}$ ).

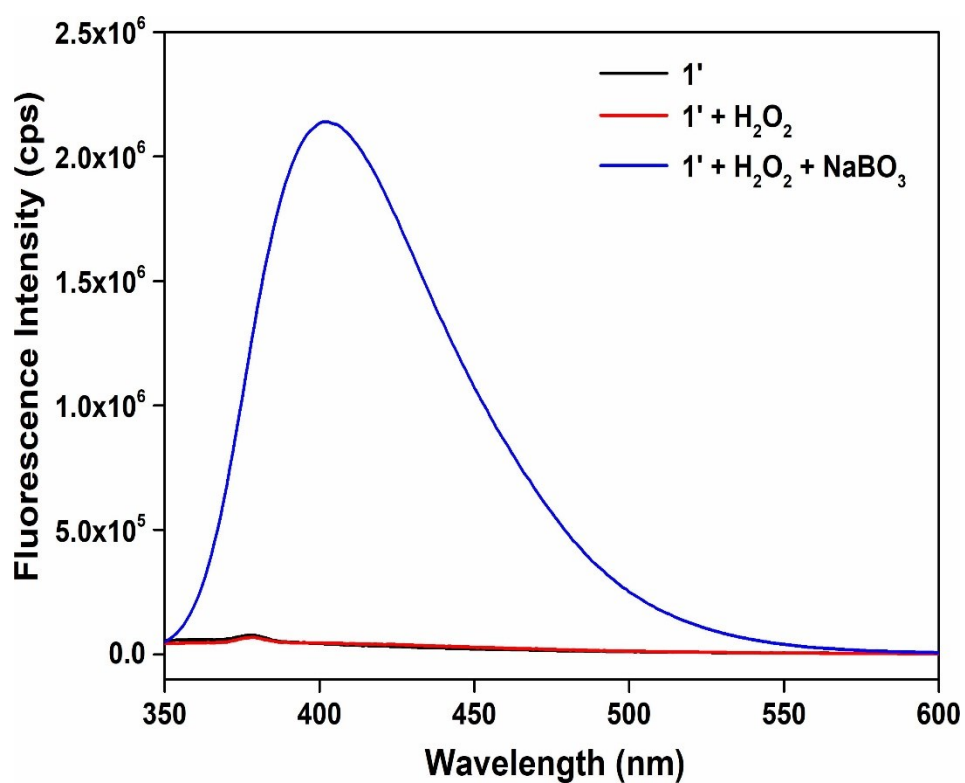

**Figure S29.** Change in the fluorescence emission intensity of 1' upon addition of 10 mM  $\text{NaBO}_3$  solution (500  $\mu\text{L}$ ) in presence of 10 mM  $\text{H}_2\text{O}_2$  solution (500  $\mu\text{L}$ ).

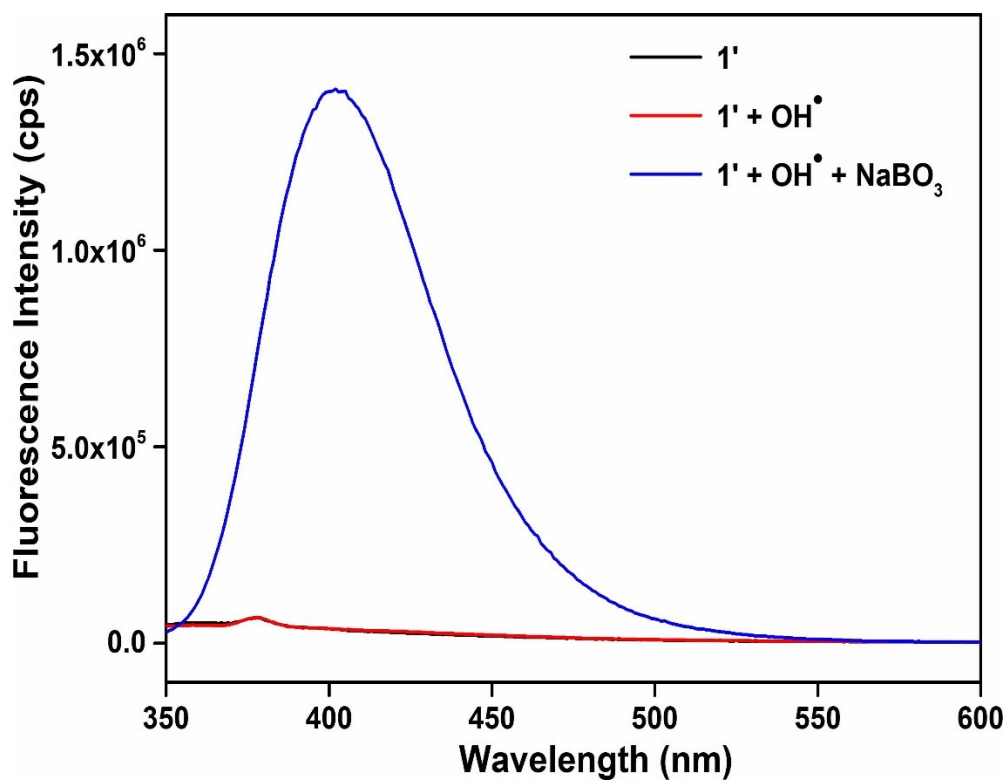

**Figure S30.** Change in the fluorescence emission intensity of **1'** upon addition of 10 mM NaBO<sub>3</sub> solution (500  $\mu$ L) in presence of 10 mM OH<sup>•</sup> solution (500  $\mu$ L).

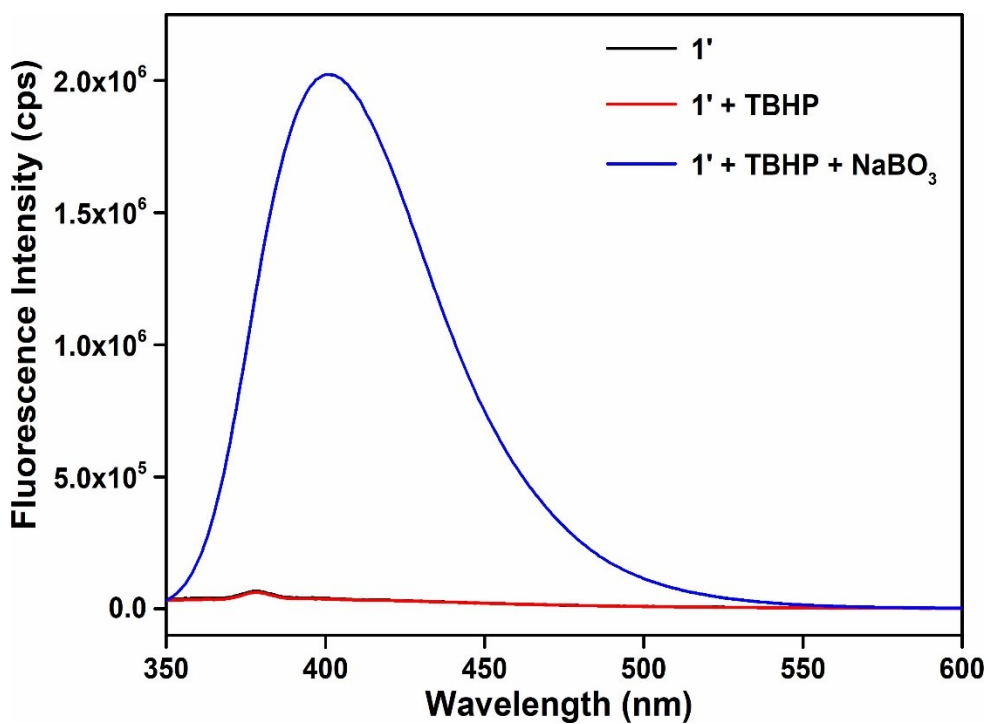

**Figure S31.** Change in the fluorescence emission intensity of **1'** upon addition of 10 mM NaBO<sub>3</sub> solution (500  $\mu$ L) in presence of 10 mM TBHP solution (500  $\mu$ L).

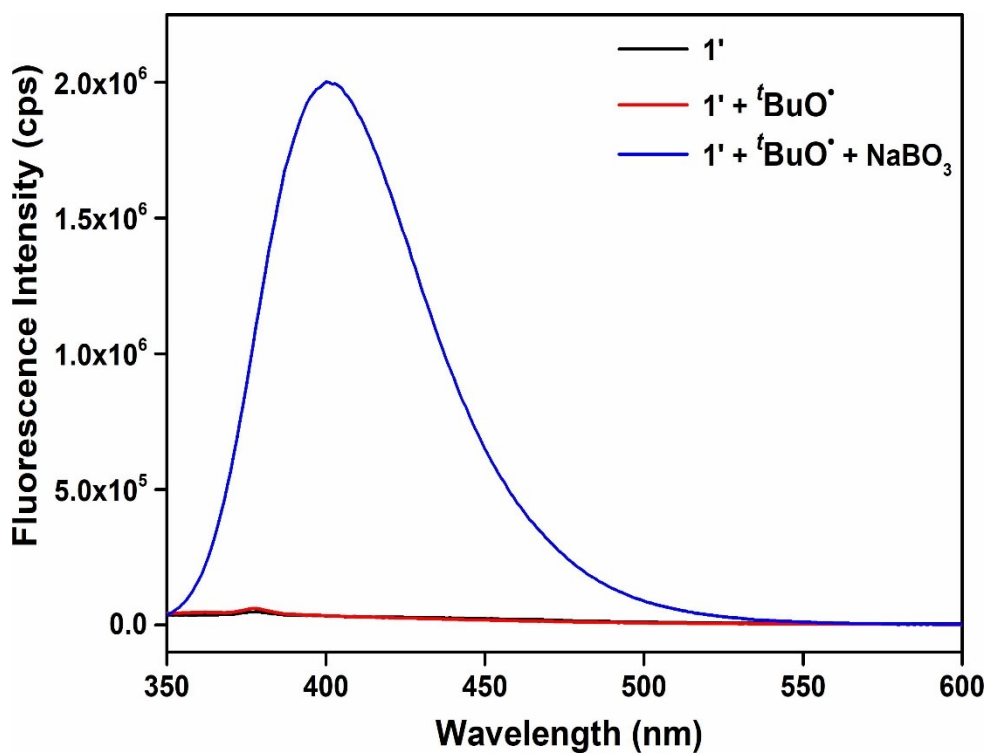

**Figure S32.** Change in the fluorescence emission intensity of **1'** upon addition of 10 mM NaBO<sub>3</sub> solution (500  $\mu$ L) in presence of 10 mM <sup>t</sup>BuO• solution (500  $\mu$ L).

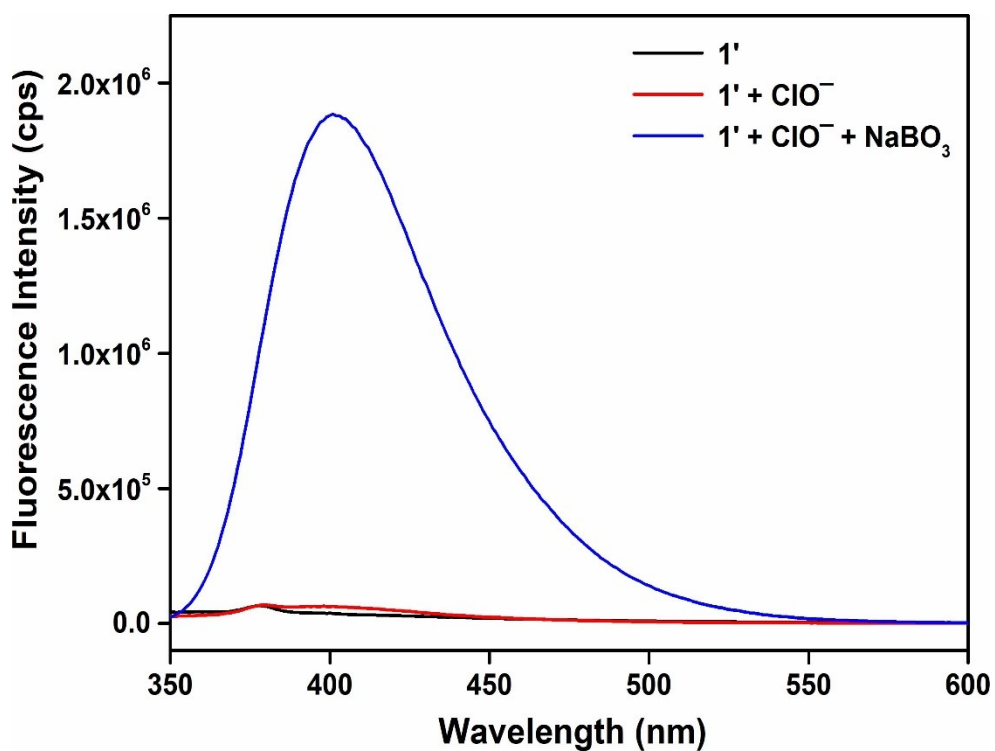

**Figure S33.** Change in the fluorescence emission intensity of **1'** upon addition of 10 mM NaBO<sub>3</sub> solution (500  $\mu$ L) in presence of 10 mM ClO<sup>-</sup> solution (500  $\mu$ L).

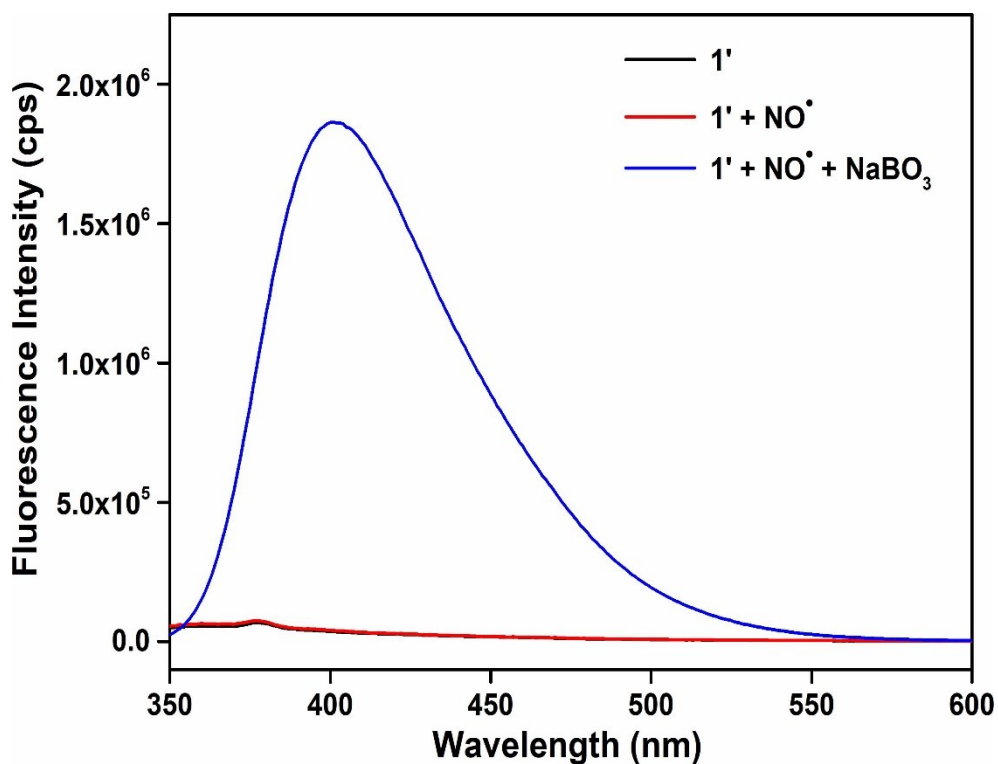

**Figure S34.** Change in the fluorescence emission intensity of **1'** upon addition of 10 mM NaBO<sub>3</sub> solution (500  $\mu$ L) in presence of 10 mM NO• solution (500  $\mu$ L).

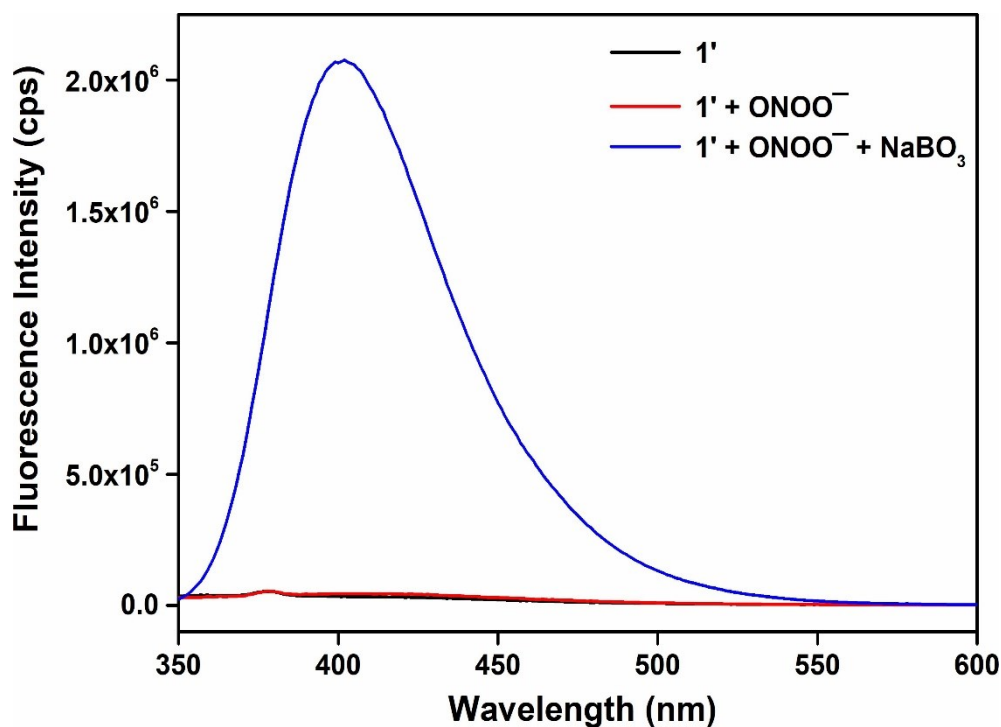

**Figure S35.** Change in the fluorescence emission intensity of **1'** upon addition of 10 mM NaBO<sub>3</sub> solution (500  $\mu$ L) in presence of 10 mM ONOO<sup>-</sup> solution (500  $\mu$ L).

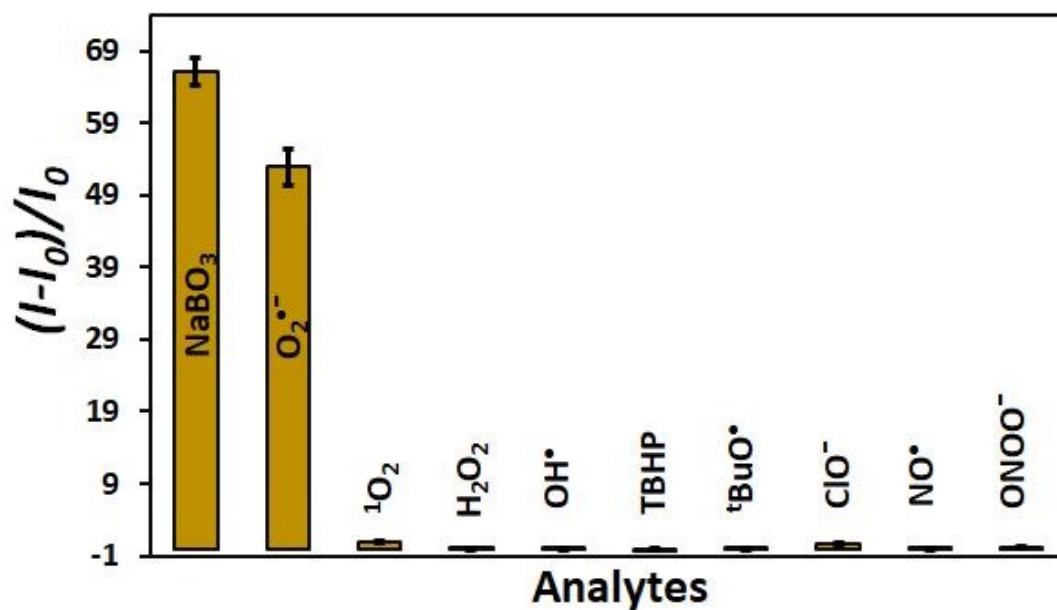

**Figure S36.** Fluorescence enhancement effect of **1'** towards the introduction of different ROS and RNS (10 mM, 500  $\mu$ L) in aqueous medium. The error bars indicate the standard deviations of three measurements.

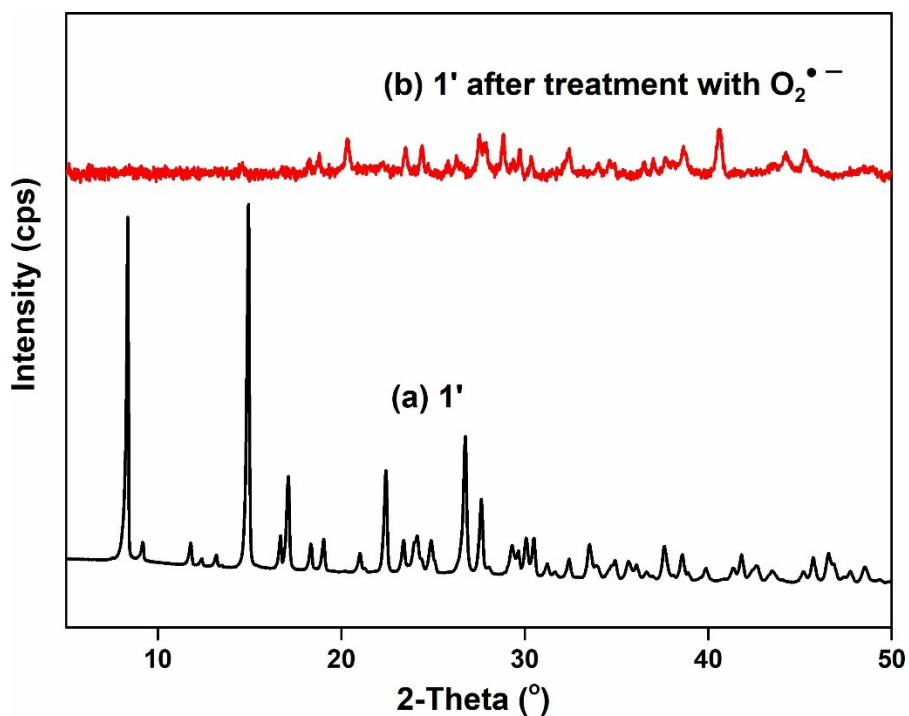

**Figure S37.** XRPD patterns of thermally activated (**1'**) (a) and after treatment with superoxide (b).

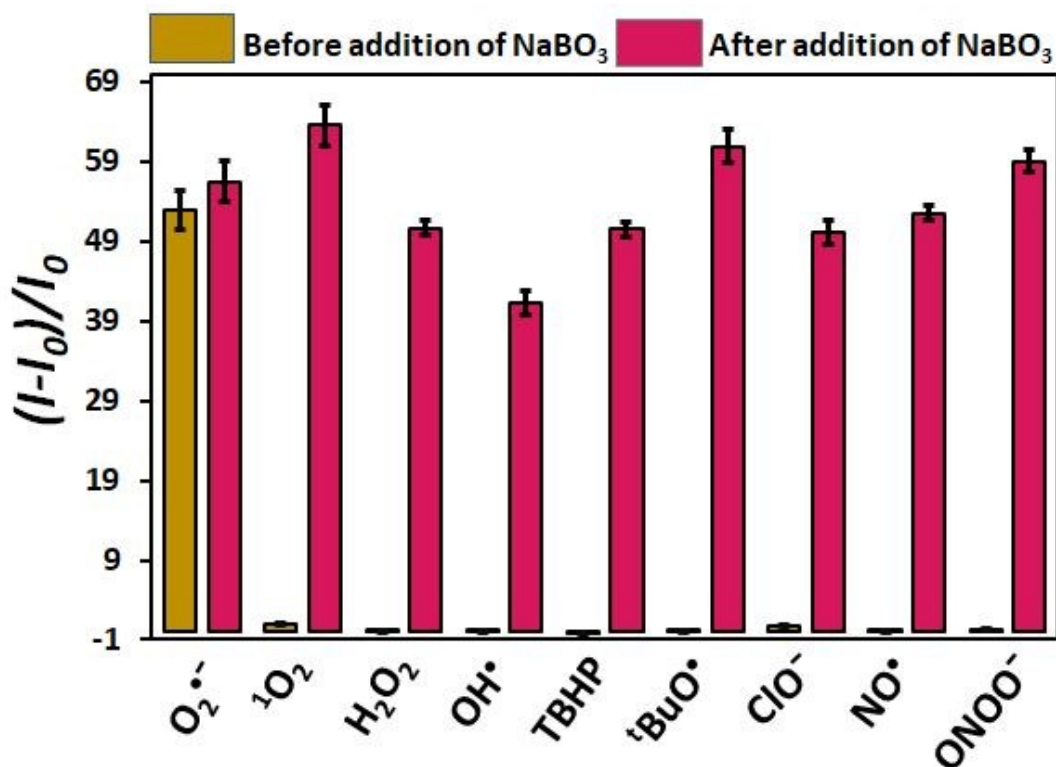

**Figure S38.** Effect in the emission intensity of aqueous suspension of 1' by the addition of perborate solution (10 mM, 500  $\mu$ L) in the co-existence of ROS and RNS. The error bars indicate the standard deviations of three measurements.

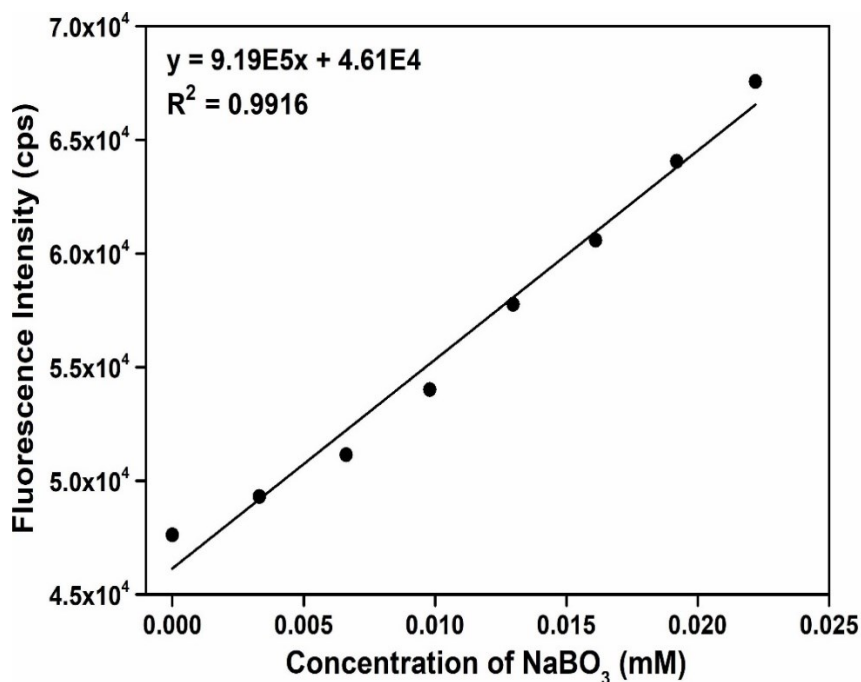

**Figure S39.** Change in the fluorescence emission intensity of 1' in aqueous medium as a function of NaBO<sub>3</sub> concentration.

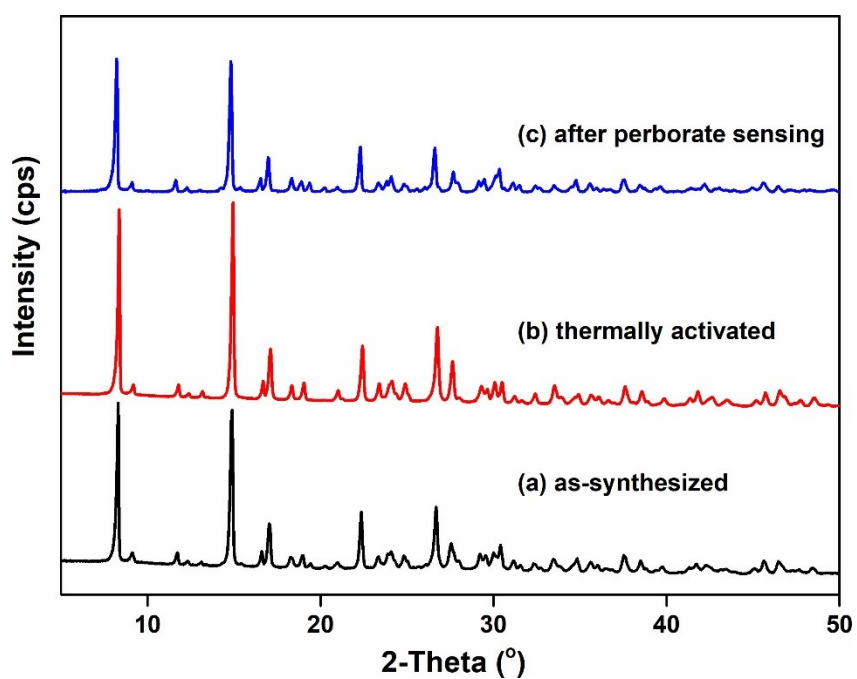

**Figure S40.** XRPD patterns of **1** in different forms: as-synthesized (a), thermally activated (b) and after perborate sensing (c).

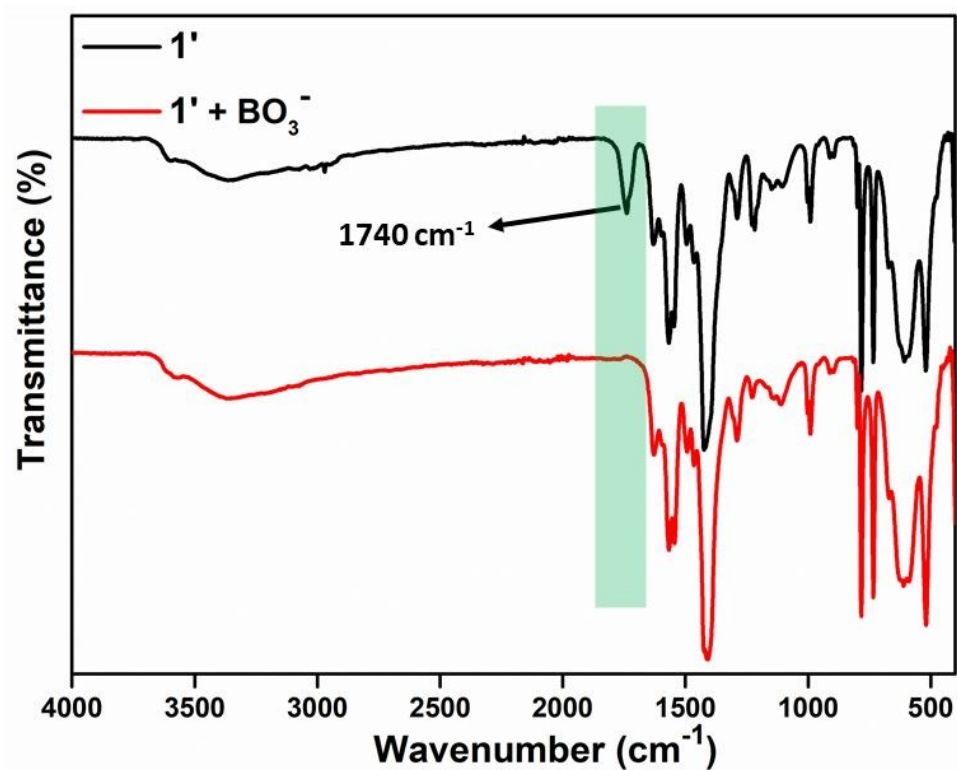

**Figure S41.** FT-IR spectra of **1'** and perborate-treated **1'** (recovered after sensing).

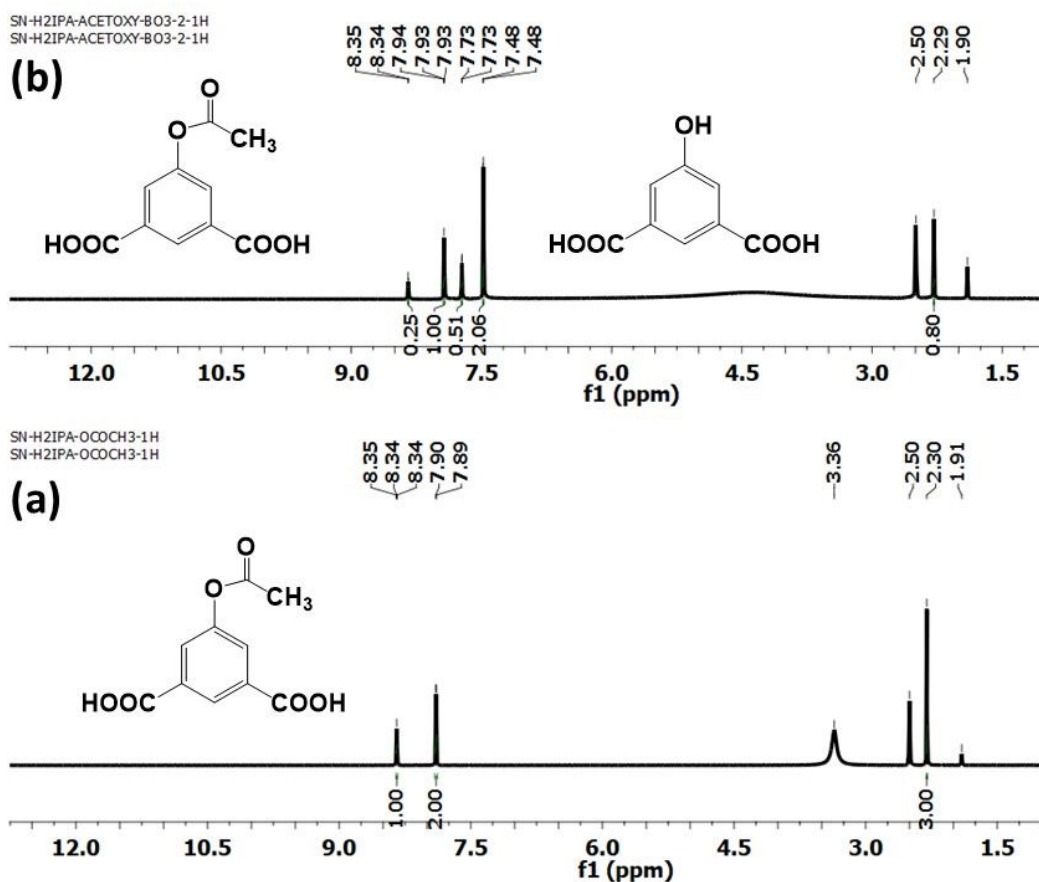

**Figure S42.** <sup>1</sup>H NMR spectrum of (a) H<sub>2</sub>IPA-OCOCH<sub>3</sub> ligand and (b) perborate-treated H<sub>2</sub>IPA-OCOCH<sub>3</sub> ligand in DMSO-*d*<sub>6</sub>. New proton signals at 7.93 ppm and 7.48 ppm signify the formation of H<sub>2</sub>IPA-OH after treatment with perborate.

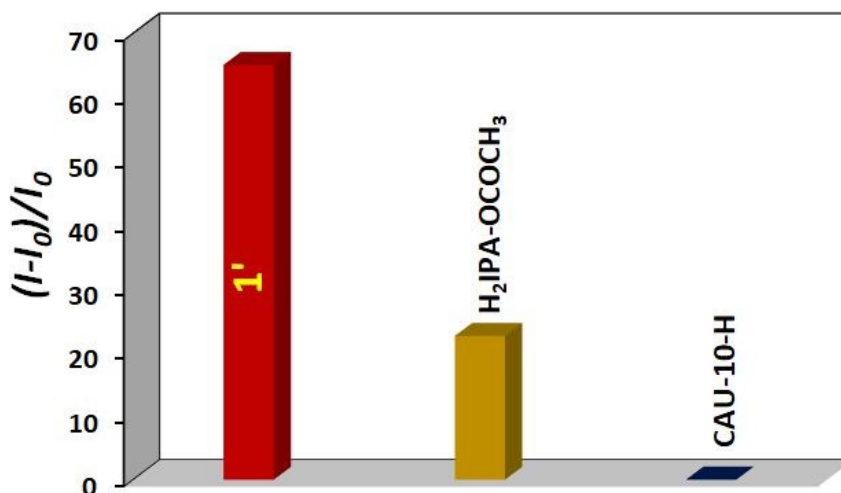

**Figure S43.** Relative fluorescence response of 1', H<sub>2</sub>IPA-OCOCH<sub>3</sub> ligand and unfunctionalized CAU-10 towards 10 mM NaBO<sub>3</sub> (500 μL) in aqueous medium.



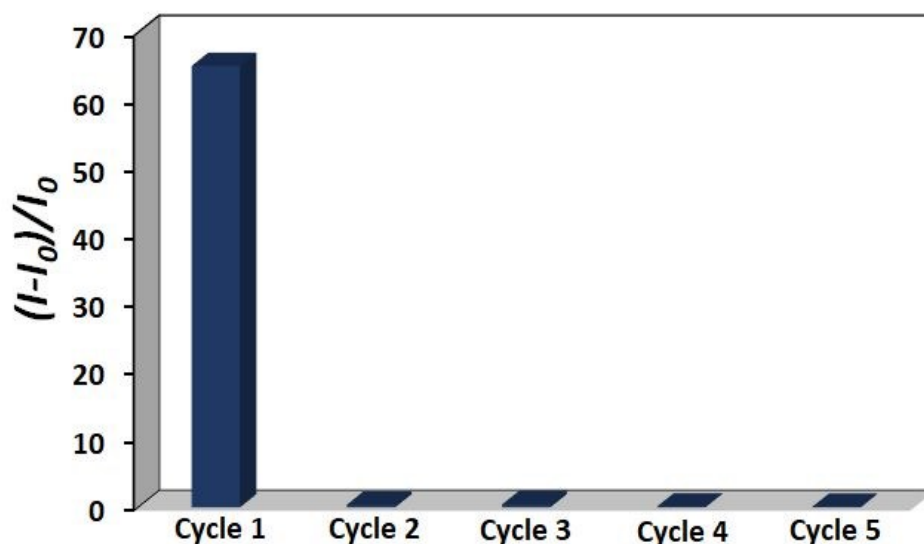

**Figure S44.** Recyclability test for the fluorescence turn-on response of **1'** towards  $\text{NaBO}_3$ .

**Table S2.** Comparison of the sensing performance of various fluorescent sensors of perborate.

| Sl. No. | Sensor                             | Type of Material | Sensing Medium                                                           | Mode of Detection | Detection Limit                            | Response Time      | Ref.      |
|---------|------------------------------------|------------------|--------------------------------------------------------------------------|-------------------|--------------------------------------------|--------------------|-----------|
| 1       | CAU-10-OCOCH <sub>3</sub>          | MOF              | water                                                                    | turn-on           | 1.19 $\mu\text{M}$                         | 5 min              | this work |
| 2       | AIE-perborate                      | organic-molecule | THF/HEPES (1/99 v/v), pH = 5.0                                           | turn-on           | 0.10 $\mu\text{M}$                         | -                  | 2         |
| 3       | APBT and ANBT                      | organic-molecule | (H <sub>2</sub> O/CH <sub>3</sub> CN=1:1 v/v, 10 mM HEPES buffer, pH=7.4 | ratiometric       | 9.04 $\mu\text{M}$ and 19.03 $\mu\text{M}$ | 90 sec and 110 sec | 3         |
| 4       | compound <b>1</b>                  | organic-molecule | acetate buffer-CH <sub>3</sub> CN (90:10, v/v), pH =4.8                  | turn-on           | $2.2 \times 10^{-5}$ M.                    | 5 min              | 4         |
| 5       | pyridyl azo-based naphthyl acetate | sol-gel          | CH <sub>3</sub> CN-H <sub>2</sub> O (1:1, v/v)                           | ratiometric       | -                                          | -                  | 5         |
| 6       | nanosensor <b>1</b>                | nano-particle    | water                                                                    | turn-on           | 0.5 $\mu\text{M}$                          | -                  | 6         |

## References:

1. J. Liu, Y. Xu, P. B. Groszewicz, M. Brodrecht, C. Fasel, K. Hofmann, X. Tan, T. Gutmann and G. Buntkowsky, *Catal. Sci. Technol.*, 2018, **8**, 5190-5200.
2. R. Zhang, M. Gao, S. Bai and B. Liu, *J. Mater. Chem. B*, 2015, **3**, 1590-1596.
3. A. K. Mahapatra, S. Mondal, S. K. Manna, K. Maiti, R. Maji, S. S. Ali, S. Mandal, M. R. Uddin and D. K. Maiti, *Chemistry Select*, 2016, **3**, 375-383.
4. M. G. Choi, S. Cha, J. E. Park, H. Lee, H. L. Jeon and S.-K. Chang, *Org. Lett.*, 2010, **12**, 1468-1471.
5. A. Panja and K. Ghosh, *Chemistry Select*, 2018, **3**, 9448-9453.
6. R. U. Gawas, S. Anand, B. K. Ghosh, P. Shivbhagwan, K. Choudhary, N. N. Ghosh, M. Banerjee and A. Chatterjee, *Chemistry Select*, 2018, **3**, 10585-10592.
